# Supplementary material for: Patients’ perceptions regarding multidrug-resistant tuberculosis and barriers to seeking care in a priority city in Brazil during COVID-19 pandemic: A qualitative study
Source: PubMed Central journal article supplement (PMC8034748; doi:10.1371/journal.pone.0249822), 2021-04-09
Supplement: pone.0249822.s001.pdf [file pone.0249822.s001.pdf]

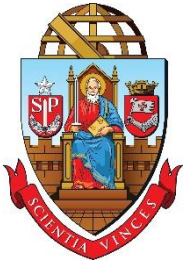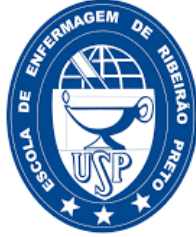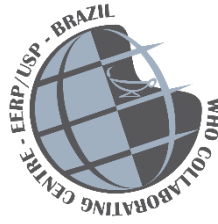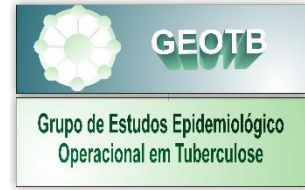

Date: \_\_\_\_/\_\_\_\_/\_\_\_\_

ID code: \_\_\_\_\_

## SEMI-STRUCTURED INTERVIEW SCRIPT

**SEMI-STRUCTURED INTERVIEW SCRIPT FOR PEOPLE WITH MULTIDRUG-RESISTANT TUBERCULOSIS**

|                                                                                                                                            |
|--------------------------------------------------------------------------------------------------------------------------------------------|
| <b>1.</b> Is this the first time that you have been treated for tuberculosis?                                                              |
| <b>2.</b> In your opinion, does multidrug-resistant tuberculosis have a cure?                                                              |
| <b>3.</b> How has been your experience of dealing with multidrug-resistant tuberculosis?                                                   |
| <b>4.</b> What were the difficulties in your treatment experience since the moment you were diagnosed?                                     |
| <b>5.</b> In your personal experience, what could be the cause of your illness?                                                            |
| <b>6.</b> Have you ever abandoned treatment? (If yes, ask to the participant why!)                                                         |
| <b>7.</b> Do you have support from your family and friends? Are you living with their?                                                     |
| <b>8.</b> How has your experience with health services been since you became ill?                                                          |
| <b>9.</b> Have you received any benefits since you became ill?                                                                             |
| <b>10.</b> How long have you been treating? Did the medication have any side effects? (If yes, ask to the participant which side effects!) |
| <b>11.</b> What do you think is most positive about the treatment? Is there anything negative?                                             |
| <b>12.</b> How has it been the treatment of multidrug-resistant tuberculosis during the COVID-19 pandemic?                                 |
